# Supplementary material for: Rac1 modulates acute and subacute genotoxin-induced hepatic stress responses, fibrosis and liver aging
Source: PubMed Central journal article supplement — Cell Death Dis. 2013 Mar 21;4(3):e558–. doi: 10.1038/cddis.2013.57 (PMC3613835; doi:10.1038/cddis.2013.57), 2013-03-21
Supplement: cddis201357x2.pdf [file cddis201357x2.pdf]

**Supplementary Table 1:** Primer sequences used for (i) RT-PCR analyses of the mRNA expression of candidate genes and (ii) genomic PCR to analyze *rac1* knock-out.

| Gene          | Primer forward                                   | Primer reverse            |
|---------------|--------------------------------------------------|---------------------------|
| Ccne1         | AGCCCTGGGATGATAATTCA                             | GCTCTGGGTGGTCTGATT        |
| Cdkn1a        | ACCTGAATAGCACTTTGGAAA                            | TCTGAGCAATGTCAAGAGTC      |
| Collagene1    | CACCCTCAAGAGCCTGAGTC                             | AGACGGCTGAGTAGGGAACA      |
| Ctgf          | CAAAGCAGCTGCAAATACCA                             | GGCCAAATGTGTCTTCCAGT      |
| Cxcr4         | ATACCTGACTTCATCTTTGCC                            | TGGAGTGTGACAGCTTAGA       |
| Elk1          | AGCCTGAGGTGTCTGTAA                               | GTGTTGGGAAGCACTGAG        |
| Fancc         | GCTTGTTGGAATCCTCTCAT                             | CCACGAGTTAAGTCCTGAC       |
| Fen1          | GGAACGATACTGAAAGAACGG                            | CGGCGAAGAGGAATGTTT        |
| Fos           | AACTTCGACCATGATGTTCT                             | GCACTAGAGACGGACAGA        |
| Gapdh         | TCTCCTGCGACTTCAACA                               | TCTCTTGCTCAGTGTCTT        |
| Hmox1         | CCAGAGTCCCTCACAGAT                               | CCCAAGAGAAGAGAGCCA        |
| Hspa1b        | AGACGCTGACAGCTACTC                               | CTCGCTTCTGGAAGGCT         |
| Icam1         | TGCTCAGGTATCCATCCAT                              | GGAAACGAATACACGGTGAT      |
| Il6           | AGTTGCCTTCTTGGGACTGA                             | CAGAATTGCCATTGCACAAC      |
| Jun           | AACTTTCCTGACCCAGAG                               | GCGAACTGGTATGAGTATAG      |
| MMP1          | GCCACCTTCTTCTTGTGTA                              | TAGTATGATTTCAAGTAGTGCTCTG |
| Mdr1          | ACCATGGAGGAAATCACAGC                             | TGGTGGCATCATCCAAGATA      |
| Mrp1          | AGGCTACTACCCAGCATT                               | CAGTCTCTCCACTGCCACAA      |
| MxCre         | CATGTGTCTTGGTGGGCTGA                             | CGCATAACCAGTGAAACAGC      |
| Rac1 cDNA     | AACCTGCCTGCTCATCAGTT                             | CTTGAGTCCTCGCTGTGTGA      |
| Rac1 DNA      | 1:ATTTTGTGCCAAGGACAGTG<br>2:GAAGGAGAAGAAGCTGACTC | CAGCCACAGGCAATGACAGA      |
| Rad51         | CAGCGATGTCCTAGATAATGTAG                          | TTACCACTGCGACACCAA        |
| RhoB          | CAGCATCAGCCATCACTTC                              | CTAGGCTCGCTAACTGCA        |
| Tgf $\beta$   | TGCGCTTGACAGAGATTAATA                            | AGCCCTGTATTCCGTCTCCT      |
| Timp2         | CAAAGCAGTGAGCGAGAA                               | CATCTTGCCATCTCCTTCTG      |
| Top2 $\beta$  | TGGGTGAACAATGCTACAAA                             | TGTATGTATCAGGACGAAGGA     |
| Wee1          | GTAGTCTCTATTCATGGACACA                           | GTTGCTTTCAGTAATTGTAATTCTT |
| Wrm           | TGATTGCTCCTTCTGTCT                               | ACTGCGACTCTGCTTCTT        |
| Xpc           | GCGAAAGAACGGGAAAGA                               | AAGCGAATTGGAATGATGGA      |
| Xrcc3         | GGAGGAAGTCTGAGTTGGT                              | CTCTTAACCGCAGCAGTAAT      |
| $\alpha$ Sma  | GGACGTACAACCTGGTATTGTGC                          | CGGCAGTAGTCACGAAGGAAT     |
| $\beta$ Actin | GCATTGCTGACAGGATGCAG                             | CCTGCTTGCTGATCCACATC      |

**Supplementary Table 2:** Semi-customized PCR array used for qRT-PCR-based analysis of the mRNA expression of 94 genes involved in DNA repair, stress response and cell death. For internal control, mRNA expression of GAPDH and beta-actin were used. The genes are listed in alphabetical order.

| Gene                                                      | NCBI Reference sequence | Primer sequences (5'-3')                         |
|-----------------------------------------------------------|-------------------------|--------------------------------------------------|
| <i>Actb</i> Actin, beta                                   | NM_007393               | GCATTGCTGACAGGATGCAG<br>CCTGCTTGCTGATCCACATC     |
| <i>Akt1</i> Thymoma viral proto-oncogene 1                | NM_009652               | AGAAGAGACTCTGAGCATCA<br>AAGGTGCCATCGTTCTTG       |
| <i>Apex1</i> Apurinic/aprimidinic endonuclease 1          | NM_009687               | AGAAATTGACCTCCGTAACC<br>CGCCAACCAACATTCTTAGA     |
| <i>Arhgdia</i> Rho GDP dissociation inhibitor (GDI) alpha | NM_133796               | CCCTACCTACCCCAAACC<br>TGGACAACCCTGACAGTG         |
| <i>Atf2</i> Activating transcription factor 2             | NM_009715               | TATCGTTCGTCCAGCATCA<br>TACTTGAGGTTGGTGAAGGTA     |
| <i>Atg3</i> Autophagy-related 3 (yeast)                   | NM_026402               | ACCACCTCCTATGTGTTCA<br>TGTGTAGTCATATTCTATTGTTGGA |
| <i>Atg7</i> Autophagy-related 7 (yeast)                   | NM_028835               | GCACAACACCAACACACT<br>CGAAGGTCAGGAGCAGAA         |
| <i>Atm</i> Ataxia telangiectasia mutated homolog (human)  | NM_007499               | ACCAGAGGATGCTGTTCA<br>ATCATTAAGTCTATGTTGAGTCCAA  |
| <i>Bax</i> Bcl2-associated X protein                      | NM_007527               | CTGGACACTGGACTTCCT<br>GCCACAAAGATGGTCACT         |
| <i>Bcl2</i> B-cell leukemia/lymphoma 2                    | NM_009741               | GTGTGGTTGCCTTATGTAT<br>GTATATCCGCTACAAGTTACA     |
| <i>Becn1</i> Beclin 1, autophagy related                  | NM_019584               | GATGGGAACTCTGGAGGT                               |

|               |                                             |           |                                                                       |
|---------------|---------------------------------------------|-----------|-----------------------------------------------------------------------|
| <i>Bid</i>    | BH3 interacting domain death agonist        | NM_007544 | GGCTGTGGTAAGTAATGGA<br>CACCATGTACCTTTGTCCTATC<br>ACCTCTCCTAATGCTGTTCT |
| <i>Birc3</i>  | Baculoviral IAP repeat-containing 3         | NM_007464 | GCTGACACCTTTGAGTTGA<br>GCAGAAGCACTTGACCTT                             |
| <i>Brca1</i>  | Breast cancer 1                             | NM_009764 | TTGTGAGCGTTTGAATGA<br>ACCTGGCTTAGTTACTGT                              |
| <i>Brca2</i>  | Breast cancer 2                             | NM_009765 | TAACGCCTGCTGACTCTC<br>TGCCAGATGAATCTCCTAACA                           |
| <i>Casp2</i>  | Caspase 2                                   | NM_007610 | TACTGCTCACAACCCTCTC<br>GGACCATCACCATTATCTAAGG                         |
| <i>Ccna1</i>  | Cyclin A1                                   | NM_007628 | GAGGGCATCATATTTGAGGAT<br>CTTGGGTCTGTGTCTTACTTC                        |
| <i>Ccnb1</i>  | Cyclin B1                                   | NM_172301 | GGTCACTAGGAACACGAAA<br>TTTGGTAGGGCTTTAAACAGT                          |
| <i>Ccne1</i>  | Cyclin E1                                   | NM_007633 | AGCCCTGGGATGATAATTCA<br>GCTCTGGGTGGTCTGATT                            |
| <i>Cd44</i>   | CD44 antigen                                | NM_009851 | ACACCTACCTTCCTACTG<br>TTGTGGACTGTGAATTACC                             |
| <i>Cdc25a</i> | Cell division cycle 25 homolog A (S. pombe) | NM_007658 | TCAAATGAAAGTGAATCAGGAAAT<br>CTTCATATTCTCGCCATCCA                      |
| <i>Cdc25b</i> | Cell division cycle 25 homolog B (S. pombe) | NM_023117 | CACATCCCTCTCCTCACT<br>GAAGCCATCAGACTCAAACCT                           |
| <i>Cdkn1a</i> | Cyclin-dependent kinase inhibitor 1A (p21)  | NM_007669 | ACCTGAATAGCACTTTGGAAA<br>TCTGAGCAATGTCAAGAGTC                         |
| <i>Cdkn1b</i> | Cyclin-dependent kinase inhibitor 1B (p27)  | NM_009875 | CCCTCCAGTACACTTGAT                                                    |

|               |                                                                                       |           |                                                                       |
|---------------|---------------------------------------------------------------------------------------|-----------|-----------------------------------------------------------------------|
| <i>Chek1</i>  | Checkpoint kinase 1 homolog (S. pombe)                                                | NM_007691 | TAAACAACAAAACCGAACAAA<br>TGAACGCTTACTGAACAAGAT<br>CCACAGGACCAAACATCAA |
| <i>Chek2</i>  | CHK2 checkpoint homolog (S. pombe)                                                    | NM_016681 | TGAGAAGGACGGACAAGT<br>TCTACATAGTGAAAGTGCGATTT                         |
| <i>Cxcr4</i>  | Chemokine (C-X-C motif) receptor 4                                                    | NM_009911 | ATACCTGACTTCATCTTTGCC<br>TGGAGTGTGACAGCTTAGA                          |
| <i>Cyp1a1</i> | Cytochrome P450, family 1, subfamily a, polypeptide 1                                 | NM_009992 | CCTCCGTTACCTGCCTAA<br>GTCCTGACAATGCTCAATGA                            |
| <i>Cyp1b1</i> | Cytochrome P450, family 1, subfamily b, polypeptide 1                                 | NM_009994 | GACGATGCGGAGTTCCTA<br>GCTGAAGTTGCGGTTGAG                              |
| <i>Ddb2</i>   | Damage specific DNA binding protein 2                                                 | NM_028119 | AGGCAACATTCTCAGAGT<br>CATTCCGGAGGTTCCAAAG                             |
| <i>Ddit3</i>  | DNA-damage inducible transcript 3                                                     | NM_007837 | GTCAGTTATCTTGAGCCTAA<br>GTGTGGTGGTGTATGAAG                            |
| <i>Elk1</i>   | ELK1, member of ETS oncogene family                                                   | NM_007922 | AGCCTGAGGTGTCTGTAA<br>GTGTTGGGAAGCACTGAG                              |
| <i>Ercc1</i>  | Excision repair cross-complementing rodent repair deficiency, complementation group 1 | NM_007948 | AAACAGGAGCAAAGTCTAAT<br>GGATGTAGTCTGGATGGA                            |
| <i>Fancc</i>  | Fanconi anemia, complementation group C                                               | NM_007985 | GCTTGTTGGAATCCTCTCAT<br>CCACGAGTTAAGTCCTGAC                           |
| <i>Fas</i>    | Fas (TNF receptor superfamily member 6)                                               | NM_007987 | AGAACCTCCAGTCGTGAA<br>ATCTATCTTGCCCTCCTTGA                            |
| <i>Fasl</i>   | Fas ligand (TNF superfamily, member 6)                                                | NM_010177 | CTGGAATGGGAAGACACATAT<br>TGGTCAGCACTGGTAAGA                           |
| <i>Fen1</i>   | Flap structure specific endonuclease 1                                                | NM_007999 | GGAACGATACTGAAAGAACGG                                                 |

|                 |                                                            |           |                                                                  |
|-----------------|------------------------------------------------------------|-----------|------------------------------------------------------------------|
| <i>Fos</i>      | FBJ osteosarcoma oncogene                                  | NM_010234 | CGGCGAAGAGGAATGTTC<br>AACTTCGACCATGATGTTCT<br>GCACTAGAGACGGACAGA |
| <i>Gadd45a</i>  | Growth arrest and DNA-damage-inducible 45 alpha            | NM_007836 | GTCGCTACATGGATCAGTG<br>GTGACTGCTTGAGTAACTACA                     |
| <i>Gapdh</i>    | Glyceraldehyde-3-phosphate dehydrogenase                   | NM_008084 | TCTCCTGCGACTTCAACA<br>TCTCTTGCTCAGTGTCTT                         |
| <i>Gpx1</i>     | Glutathione peroxidase 1                                   | NM_008160 | TTGGTGATTACTGGCTGC<br>TGATATTCAGCACTTTATTCTTAGTAG                |
| <i>Gstm1</i>    | Glutathione S-transferase, mu 1                            | NM_010358 | ACACAGCCTTCATTCTCC<br>AATTCTAGGAAGCGTGAGTT                       |
| <i>Hif1a</i>    | Hypoxia inducible factor 1, alpha subunit                  | NM_010431 | GAGGAGCGCCTAGGAACC<br>CGGAGAAAGAGACAAGTCCA                       |
| <i>Hmox1</i>    | Heme oxygenase (decycling) 1                               | NM_010442 | CCAGAGTCCCTCACAGAT<br>CCCAAGAGAAGAGAGCCA                         |
| <i>Hsp90aa1</i> | Heat shock protein 90, alpha (cytosolic), class A member 1 | NM_010480 | CGGAGGCTTCTGGAAGA<br>CATCGTGGCTGAATGAACA                         |
| <i>Hspa1b</i>   | Heat shock protein 1B (Hsp70)                              | NM_010478 | AGACGCTGACAGCTACTC<br>CTCGCTTCTGGAAGGCT                          |
| <i>Hus1</i>     | Hus1 homolog (S. pombe)                                    | NM_008316 | TGGAAGGAGTCTCTGAAGAA<br>AGGGAAAGTGTGGTTAGTCA                     |
| <i>Icam1</i>    | Intercellular adhesion molecule 1                          | NM_010493 | TGCTCAGGTATCCATCCAT<br>GGAAACGAATACACGGTGAT                      |
| <i>Il12a</i>    | Interleukin 12a                                            | NM_008351 | GGAACACACAAGAACGAGAG<br>CGCCATTATGATTCAGAGACT                    |
| <i>Itgb1</i>    | Integrin beta 1 (fibronectin receptor beta)                | NM_010578 | GCCAGCCAAGTGACATAG                                               |

|               |                                                             |           |                                                                    |
|---------------|-------------------------------------------------------------|-----------|--------------------------------------------------------------------|
| <i>Jun</i>    | Jun oncogene                                                | NM_010591 | ACTTCTGTGGTTCTCCTGAT<br>AACTTTCCTGACCCAGAG<br>GCGAACTGGTATGAGTATAG |
| <i>Lamp1</i>  | Lysosomal-associated membrane protein 1                     | NM_010684 | AAGTGGAGAACAAGAACAGAG<br>TCAGTGAATGGTTGGAGATG                      |
| <i>Lig1</i>   | Ligase I, DNA, ATP-dependent                                | NM_010715 | ATTTCTGGGTTTTCGCTCTC<br>ACCACTTGATTCTCTCTCTT                       |
| <i>Lig4</i>   | Ligase IV, DNA, ATP-dependent                               | NM_176953 | GTGTCCTGATGCTTAGTTGT<br>CTCCTTGAAGTGCCTGATT                        |
| <i>Mdm2</i>   | Transformed mouse 3T3 cell double minute 2                  | NM_010786 | AAGGTGGGAGTGATCTGAA<br>TCTGTGTTCTCTTCTGTCTCA                       |
| <i>Mgmt</i>   | O-6-methylguanine-DNA methyltransferase                     | NM_008598 | GCTGCTGAAGTTGTGAA<br>TCTCATTGCTCCTCCTACTG                          |
| <i>Mmp13</i>  | Matrix metalloproteinase 13; collagenase 1; Mmp1            | NM_008607 | GCCACCTTCTTCTTGTGA<br>TAGTATGATTTCAAGTAGTGCTCTG                    |
| <i>Mmp3</i>   | Matrix metalloproteinase 3                                  | NM_010809 | GCTGTGGGAAAGTCAATGA<br>GCCATAGTAGTTTTCTAGGTATT                     |
| <i>Mmp7</i>   | Matrix metalloproteinase 7                                  | NM_010810 | GAACAGGCTCAGAATTATCTTAGA<br>CCACTACGATCCGAGGTAA                    |
| <i>Mpg</i>    | N-methylpurine-DNA glycosylase                              | NM_010822 | CTGTATGTGTACCTCATCTATGG<br>CAGAGTTCACGGTCCTTG                      |
| <i>Mre11a</i> | Meiotic recombination 11 homolog A ( <i>S. cerevisiae</i> ) | NM_018736 | TACGGCTTAGGCTCCATT<br>ATGCTTACTCCTGTTCTGATG                        |
| <i>Msh2</i>   | MutS homolog 2 ( <i>E. coli</i> )                           | NM_008628 | GTCTAAGGAGAATGAGTGGTATC<br>CCATAACGCCAACGGAAG                      |
| <i>Nos2</i>   | Nitric oxide synthase 2, inducible                          | NM_010927 | GCTGTTAGAGACACTTCTGAG                                              |

|              |                                                                                         |           |                                                                      |
|--------------|-----------------------------------------------------------------------------------------|-----------|----------------------------------------------------------------------|
| <i>Nos3</i>  | nitric oxide synthase 3, endothelial cell                                               | NM_008713 | CACTTTGGTAGGATTTGACTTTG<br>GCATGGGCAACTTGAAGA<br>AGGGTGTTCGTAGGTGATG |
| <i>Nox1</i>  | NADPH oxidase 1                                                                         | NM_172203 | GGCTAAATCCCATCCAGTC<br>CCTAAGCAGATGATATAGACGATAA                     |
| <i>Ogg1</i>  | 8-oxoguanine DNA-glycosylase 1                                                          | NM_010957 | TGAGACTGCTGAGACAAGA<br>GGAAGCCATGATAAGTGACA                          |
| <i>Pcna</i>  | Proliferating cell nuclear antigen                                                      | NM_011045 | GACTTAGATGTGGAGCAACTT<br>GGCTAAGGTCTCGGCATA                          |
| <i>Pold1</i> | Polymerase (DNA directed), delta 1, catalytic subunit                                   | NM_011131 | CTCCATTTCTCCGCATCAC<br>CAATGTCAGCATCCACCAT                           |
| <i>Pole</i>  | Polymerase (DNA directed), epsilon                                                      | NM_011132 | CGGTGGATTACTACTTCATTCA<br>CTTCTTTGGGCACATTCTCTA                      |
| <i>Pten</i>  | Phosphatase and tensin homolog                                                          | NM_008960 | ATCAAGAGATCGTTAGCAGAAA<br>TTGGCGGTGTCATAATGTC                        |
| <i>Rac1</i>  | RAS-related C3 botulinum substrate 1                                                    | NM_009007 | ACAAAGCCTTCTTAAAGCCTTA<br>GCGGTCTTCTTAGCAACA                         |
| <i>Rad51</i> | RAD51 homolog ( <i>S. cerevisiae</i> )                                                  | NM_011234 | CAGCGATGTCCTAGATAATGTAG<br>TTACCACTGCGACACCAA                        |
| <i>Rev1</i>  | REV1 homolog ( <i>S. cerevisiae</i> )                                                   | NM_019570 | TCTGCGGAGGAATTGAGA<br>ACACAGGATTGAAGTTGAGAC                          |
| <i>Rev3l</i> | REV3-like, catalytic subunit of DNA polymerase zeta RAD54 like ( <i>S. cerevisiae</i> ) | NM_011264 | TTCTCAGATGGCATTTCAGTATC<br>TCATTATGGCTCCGCTTTG                       |
| <i>Rhoa</i>  | Ras homolog gene family, member A                                                       | NM_016802 | AAGTCTGGGTGCCTCAT<br>AATAATCGTGGTTGGCTTCTAA                          |
| <i>Rheb</i>  | Ras homolog gene family, member B                                                       | NM_007483 | CAGCATCAGCCATCACTTC                                                  |

|               |                                           |           |                                                                   |
|---------------|-------------------------------------------|-----------|-------------------------------------------------------------------|
| <i>Sele</i>   | Selectin, endothelial cell                | NM_011345 | CTAGGCTCGCTAACTGCA<br>TGCAGAGAAGAACGGATAGA<br>CTGAATTGCCACCAGATGT |
| <i>Sod1</i>   | Superoxide dismutase 1, soluble           | NM_011434 | ACCAGTTGTGTTGTCAGG<br>TTTCTTAGAGTGAGGATTAATGAG                    |
| <i>Tiam1</i>  | T-cell lymphoma invasion and metastasis 1 | NM_009384 | GGTAGAACCATTTGTGGACTG<br>CGGTGTGGCATTAGAGAC                       |
| <i>Timp2</i>  | Tissue inhibitor of metalloproteinase 2   | NM_011594 | CAAAGCAGTGAGCGAGAA<br>CATCTTGCCATCTCCTTCTG                        |
| <i>Top2a</i>  | Topoisomerase (DNA) II alpha              | NM_011623 | CTTCAGGAGCCGTCACCAT<br>GAGCAGTATATGTTCCAGTTGT                     |
| <i>Top2b</i>  | Topoisomerase (DNA) II beta               | NM_009409 | TGGGTGAACAATGCTACAAA<br>TGTATGTATCAGGACGAAGGA                     |
| <i>Trex1</i>  | Three prime repair exonuclease 1          | NM_011637 | GCTACCACTGGAACAACC<br>TGCTATGGAAGTCTTTATTCATCA                    |
| <i>Trp53</i>  | Transformation related protein 53         | NM_011640 | AAGTTCTGTAGCTTCAGTTCAT<br>GGCAGTCATCCAGTCTTC                      |
| <i>Trp63</i>  | Transformation related protein 63         | NM_011641 | AGCATCAGAAAGCAGCAA<br>GATCTTCAGCAACATCTCGTA                       |
| <i>Trp73</i>  | Transformation related protein 73         | NM_011642 | CTCCGCACCCTTATAACC<br>GCTGAGCAAATTGAACTGG                         |
| <i>Txnrd1</i> | Thioredoxin reductase 1                   | NM_015762 | CAGTTCGTCCCAACGAAAAT<br>GCACATTGGTCTGCTCTTCA                      |
| <i>Vcam1</i>  | Vascular cell adhesion molecule 1         | NM_011693 | ATATACTTGAAGTGTCTGTGT<br>GACCATCTTCACAGGCATT                      |
| <i>Wee1</i>   | WEE 1 homolog 1 (S. pombe)                | NM_009516 | GTAGTCTCTATTCATGGACACA                                            |



|              |                                                                        |           |                                                                         |
|--------------|------------------------------------------------------------------------|-----------|-------------------------------------------------------------------------|
| <i>Wrm</i>   | Werner syndrome homolog (human)                                        | NM_011721 | GTTGCTTTCAGTAATTGTAATTCCTT<br>TGATTGCTCCTTCCTGTCT<br>ACTGCGACTCTGCTTCTT |
| <i>Wrip1</i> | Werner helicase interacting protein 1                                  | NM_030215 | GCCAATGAGATCCCTTCG<br>AACCTTATGCTGTGCTTCTT                              |
| <i>Xpa</i>   | Xeroderma pigmentosum, complementation group A                         | NM_011728 | GACAACCACTCACCAACATA<br>TGAACCTTGAACAGGGTCTTTA                          |
| <i>Xpc</i>   | Xeroderma pigmentosum, complementation group C                         | NM_009531 | GCGAAAGAACGGGAAAGA<br>AAGCGAATTGGAATGATGGA                              |
| <i>Xrcc1</i> | X-ray repair complementing defective repair in Chinese hamster cells 1 | NM_009532 | CCAACCGTGTTTCGCATTT<br>GCACTGTCATCCTCCTCTT                              |
| <i>Xrcc3</i> | X-ray repair complementing defective repair in Chinese hamster cells 3 | NM_028875 | GGAGGAAGTCTGAGTTGGT<br>CTCTTAACCGCAGCAGTAAT                             |
| <i>Xrcc4</i> | X-ray repair complementing defective repair in Chinese hamster cells 4 | NM_028012 | TGCCTGGACACCATTACA<br>CTTCTCATTTCAGCACCAAGAT                            |

---

**Supplementary table 3:** Efficiency of Cre-mediated *rac1* knockout in several tissues. *Rac1*<sup>flox/flox/Mx1-Cre</sup> mice were treated with poly(I:C) (3 x 0.5 mg) every other day. Animals were sacrificed three weeks later. DNA, mRNA and protein extracts were prepared and analysed as described in material and methods. Data shown are based on the analysis of n = 2-3 mice per group. 0: efficiency < 20%; +: efficiency 20% – 70%; ++: efficiency > 70%; n.d.: not determined.

| Organ       | DNA level | mRNA level | Protein level |
|-------------|-----------|------------|---------------|
| Liver       | ++        | ++         | ++            |
| Bone marrow | ++        | n.d.       | n.d.          |
| Blood       | +         | n.d.       | n.d.          |
| Lung        | +         | +          | +             |
| Spleen      | +         | +          | +             |
| Heart       | +         | 0          | +             |
| Kidney      | +         | 0          | 0             |
| Intestine   | 0         | 0          | 0             |
| Brain       | 0         | 0          | 0             |

**Supplementary table 4:** Serum parameters of wild-type mice as compared to mice lacking hepatic rac1 gene for different periods of time (i.e. 3 months versus 15 months). Data are shown as the mean  $\pm$  sd. \*  $p < 0.05$ .

| Time point<br>Rac1 | 0 months<br>wt (n=12) | 3 months       |                  | 15 months      |                |
|--------------------|-----------------------|----------------|------------------|----------------|----------------|
|                    |                       | wt (n=4)       | ko (n=3)         | wt (n=4)       | ko (n=3)       |
| Creatinine (mg/dl) | 0.8                   | 0.8            | 0.8              | 0.8            | 0.8            |
| Blood urea (mg/dl) | 25.0 $\pm$ 4.9        | 24.0 $\pm$ 3.3 | 29.3 $\pm$ 2.3   | 28.0 $\pm$ 4.0 | 22.6 $\pm$ 4.6 |
| GPT (U/l)          | 20.3 $\pm$ 1.2        | 21.0 $\pm$ 2.0 | 28.0 $\pm$ 4.0*  | 20.0 $\pm$ 0.0 | 20.0 $\pm$ 0.0 |
| GLDH (U/l)         | 25.3 $\pm$ 15.9       | 13.3 $\pm$ 2.9 | 30.3 $\pm$ 10.2* | 27.5 $\pm$ 5.6 | 28.3 $\pm$ 9.8 |
